# Supplementary material for: Distribution, sources and risk assessment of heavy metals in Yangshan port and its adjacent sea areas
Source: Frontiers journal article supplement (doi:10.3389/fmars.2024.1512115), 2025-01-08
Supplement: Table_1.docx [file Table_1.docx]

# Supplementary Material

Table S1 Ecological characteristics and morphometric records of collected fish and crustaceans

| **Category** | **Species name** | **Vernacular name** | **Habitat** | **n** | **Length (cm)** | **Weight (g)** |
| --- | --- | --- | --- | --- | --- | --- |
| Fish | *Miichthys miiuy* | Brown croaker | Sub-benthic | 9 | 36.24±6.84 | 792.76±70.46 |
|  | *Cynoglossus joyneri* | Joyner's tongue fish | Demersal | 9 | 10.98±2.68 | 29.08±13.22 |
|  | *Collichthys lucidus* | Big head croaker | Sub-benthic | 9 | 10.02±2.95 | 21.24±12.26 |
|  | *Coilia nasus* | Japanese grenadier anchovy | Demersa | 9 | 6.52±1.01 | 3.78±1.99 |
| Crustaceans | *Charybdis japonica* | Reddish brown | Demersal | 3 | 5.74±1.22 | 43.77±19.99 |

Table S2. Relationships between evaluations and pollution levels.

| **Index** | **Range** | **Degree** |
| --- | --- | --- |
| BSAF | BSAF<1 | no significant accumulating effect |
| BSAF≥1 | significant accumulating effect |
| BAF | BAF<100 | no significant accumulating effect |
| BAF≥100 | significant accumulating effect |

Table S3 Parameters for ecological risk assessment of heavy metals in seawater

| **Heavy metal** | **Cu** | **Pb** | **Zn** | **Cd** | **Hg** | **As** | **Cr** |
| --- | --- | --- | --- | --- | --- | --- | --- |
| HC5(μg/L) | 0.870 | 9.530 | 29.090 | 2.570 | 1.080 | 9.330 | 1.160 |
| PNEC(μg/L) | 0.174 | 1.906 | 5.818 | 0.514 | 0.216 | 1.866 | 0.232 |
| RQ | 0.0072 | 0.0007 | 0.0002 | 0.0024 | 0.0058 | 0.0007 | 0.0054 |

Table S4 Criteria for degrees of pollution status and ecological risk of heavy metals in sediments.

| **Index** | | **Range** | **Degree** |
| --- | --- | --- | --- |
| Igeo | | Igeo ≤ 0 | Almost unpolluted |
| 0 < Igeo ≤ 1 | Unpolluted to moderately polluted |
| 1 < Igeo ≤ 2 | Moderately polluted |
| 2 < Igeo ≤ 3 | Moderately to severely polluted |
| 3 < Igeo ≤ 4 | Severely polluted |
| 4 < Igeo ≤ 5 | Severely to extremely polluted |
| Igeo > 5 | Extremely polluted |
| PERI |  | < 40 | Low risk |
| 40 ≤ < 80 | Moderate risk |
| 80 ≤ < 160 | Considerable risk |
| 160 ≤ < 320 | High risk |
| >320 | Very high risk |
| RI | RI < 150 | Low risk |
| 150 ≤ RI < 300 | Moderate risk |
| 300 ≤ RI < 600 | Considerable risk |
| RI ≥ 600 | High risk |

Table S5. Relationships between evaluations and pollution levels.

| **Index** | **Range** | **Degree** | **Level** |
| --- | --- | --- | --- |
| HQ/HI | 1≤HQ/HI<1.5 | Low health risk/ |  |
| 1.5≤HQ/HI<2 | Moderate -low health risk | III |
| 2≤HQ/HI<2.5 | Moderate health risk | IV |
| 2.5≤HQ/HI<3 | Moderate-high health risk | V |
| HQ/HI≥3 | High risk | VI |
| CR | CR≤1E-6 | No risk |  |
| 1E-6<CR≤1E-4 | low risk | II |
| 1E-4<CR≤1E-3 | Moderate risk |  |
| 1E-3<CR≤0.1 | high risk | IV |
| CR>0.1 | extremely high risk | V |

Table S6. Exposure factor parameters in risk assessment model.

| Parameters | Unit | Distribution Models | Value | | References |
| --- | --- | --- | --- | --- | --- |
|  |  |  | Adults | Child |  |
| IR | g/day/person | lognormal | 10.7 | 1.9 | (Tong *et al.*, 2023) |
| ED | Year | homogeneous | 26 | 6 | (Pursiainen *et al.*, 2021) |
| EF | Days/year | triangular | 350 | 350 | (Pursiainen *et al.*, 2021) |
| BW | kg | lognormal | 60 | 15 | (Yu *et al.*, 2022) |
| AT | day | point | CR25500 | CR25500 | (Pursiainen *et al.*, 2021) |
| HQ9490 | HQ2190 |  |
| RfD | μg/（kg×day） | - | Contaminant-specific | Contaminant-specific | (Özkaynak *et al.*, 2022; Guan *et al.*, 2024) |
| SF | (kg×day)/ μg | - | Pb(0.0085),Cd(6.3),Cr(0.5),As(1.5) | | (Özkaynak *et al.*, 2022; Guan *et al.*, 2024) |

Table S7 Principal component analysis of heavy metals in sediments

| **Variables** | **F1** | **F2** |
| --- | --- | --- |
| Cu | 0.916 | -0.111 |
| Pb | 0.959 | -0.178 |
| Zn | 0.942 | 0.010 |
| Cd | 0.811 | 0.538 |
| Hg | 0.914 | 0.328 |
| As | -0.723 | -0.031 |
| Cr | 0.917 | -0.185 |
| TOC | -0.355 | 0.915 |
| Eigenvalue | 5.629 | 1.313 |
| Contribution rate % | 70.356 | 16.417 |
| Cumulative contribution rate % | 70.356 | 86.773 |

**References：**

Guan C., X. Zhao, T. Qu, B. Sun, Y. Zhong, C. Hou*, et al.* (2024). Quantitative and Predictive Evaluation of Heavy Metal Pollution in Bay Ecosystems of Northern China: Characteristics, Accumulation, and Risk Assessment. ACS ES&T Water 4 (1), 57-67.10. doi: 1021/acsestwater.3c00334

Özkaynak Ö.H., G.T. İçemer, and H. Merdun. (2022). Determination of the Risk on Human Health of Heavy Metals Contained by Ship Source Bilge and Wastewater Discharged to the Sea on the Mediterranean by Monte Carlo Simulation. Sustainability, 14 (14), 8408. doi: 10.3390/su14148408

Pursiainen A., L. Veneranta, S. Kuningas, A. Saarinen, and M. Kallasvuo. (2021). The more sheltered, the better – Coastal bays and lagoons are important reproduction habitats for pike in the northern Baltic Sea. Estuarine, Coastal and Shelf Science 259, 107477.<https://doi.org/10.1016/j.ecss.2021.107477>

Tong Y., L. Lin, Y. Tao, Y. Huang, and X. Zhu. (2023). The occurrence, speciation, and ecological effect of plastic pollution in the bay ecosystems. Science of The Total Environment 857, 159601.<https://doi.org/10.1016/j.scitotenv.2022.159601>

Yu W., D. Zhang, J. Liao, L. Ma, X. Zhu, W. Zhang*, et al.* (2022). Linking ecosystem services to a coastal bay ecosystem health assessment: A comparative case study between Jiaozhou Bay and Daya Bay, China. Ecological Indicators 135, 108530.<https://doi.org/10.1016/j.ecolind.2021.108530>
